# Supplementary material for: A patient-reported pressure ulcer health-related quality of life instrument for use in prevention trials (PU-QOL-P): psychometric evaluation
Source: PubMed Central journal article supplement (PMC6288857; doi:10.1186/s12955-018-1049-x), 2018-12-10
Supplement: 12955_2018_1049_MOESM1_ESM.pdf [file 12955_2018_1049_MOESM1_ESM.pdf]

**Additional file 1** Baseline data for sample who completed PU-QOL-P (n=617): Scale data completeness and targeting

| Scale (n items)                                | Data completeness -<br>Computable scale<br>scores (%) | Targeting               |                     |                         |                |        |                             |          |
|------------------------------------------------|-------------------------------------------------------|-------------------------|---------------------|-------------------------|----------------|--------|-----------------------------|----------|
|                                                |                                                       | Possible<br>score range | Range mid-<br>point | Observed<br>score range | Mean<br>score* | SD     | Floor/Ceiling<br>effect (%) | Skewness |
| Pain (12)                                      | 617 (100)                                             | 0 – 100                 | 50                  | 0 – 100                 | 20.90          | 24.594 | 37.5/0.8                    | 1.130    |
| Exudate (8)                                    | 62^ (100)                                             | 0 – 100                 | 50                  | 0-86                    | 5.83           | 15.525 | 75.8/1.6                    | 3.749    |
| Odour (6)                                      | 62^ (100)                                             | 0 – 100                 | 50                  | 0-25                    | 0.54           | 3.330  | 96.8/1.6                    | 6.927    |
| Sleep (7)                                      | 538 (87.2)                                            | 0 – 100                 | 50                  | 0-100                   | 21.72          | 30.880 | 53.0/4.7                    | 1.274    |
| Movement & mobility (9)                        | 449 (72.8)                                            | 0 – 100                 | 50                  | 0-100                   | 36.67          | 38.022 | 42.1/12.7                   | 0.442    |
| Daily activities (6)                           | 446 (72.3)                                            | 0 – 100                 | 50                  | 0-100                   | 20.50          | 32.734 | 64.1/5.7                    | 1.346    |
| Malaise (5)                                    | 449 (72.8)                                            | 0 – 100                 | 50                  | 0-100                   | 18.01          | 30.386 | 67.0/5.0                    | 1.537    |
| Emotional well-being (15)                      | 514 (83.3)                                            | 0 – 100                 | 50                  | 0-100                   | 15.83          | 27.965 | 63.6/2.7                    | 1.744    |
| Self-consciousness and<br>appearance (7 items) | 518 (83.9)                                            | 0 – 100                 | 50                  | 0-100                   | 8.70           | 20.131 | 75.3/1.1                    | 2.730    |
| Itchiness (1)                                  | 549 (89.0)                                            | 0 – 100                 | 50                  | 0-100                   | 12.28          | 27.496 | 81.3/5.8                    | 2.165    |
| Global QOL (1)                                 | 565 (91.6)                                            | 0 – 100                 | 50                  | 0-100                   | 47.639         | 38.592 | 32.2/27.5                   | 0.081    |

\*High scores indicate great bother/impact

^sample n=62; only patients with a category  $\geq 2$  PU complete exudate and odour scales.

SD standard deviation

Floor effect =% scoring 100 (greatest bother/impact); ceiling effect = % scoring 0 (least bother/impact)

**Table** Baseline data for sample who completed SF-12 (n=1425): Scale data completeness and targeting

| Scale (n items)          | Data completeness -<br>Computable scale<br>score (%) | Targeting               |                     |                         |                |        |                             |          |
|--------------------------|------------------------------------------------------|-------------------------|---------------------|-------------------------|----------------|--------|-----------------------------|----------|
|                          |                                                      | Possible<br>score range | Range mid-<br>point | Observed<br>score range | Mean<br>score* | SD     | Floor/Ceiling<br>effect (%) | Skewness |
| Physical functioning (2) | 1425 (100)                                           | 0 – 100                 | 50                  | 0 – 100                 | 8.608          | 20.281 | 80.3/1.6                    | 2.641    |
| Role physical (2)        | 1425 (100)                                           | 0 – 100                 | 50                  | 0 – 100                 | 21.497         | 23.653 | 37.7/2.0                    | 1.207    |
| Bodily pain (1)          | 1425 (100)                                           | 0 – 100                 | 50                  | 0 – 100                 | 51.51          | 37.040 | 20.0/25.5                   | -0.003   |
| General health (1)       | 1425 (100)                                           | 0 – 100                 | 50                  | 0 – 100                 | 34.32          | 30.321 | 29.2/2.8                    | 0.488    |
| Vitality (1)             | 1425 (100)                                           | 0 – 100                 | 50                  | 0 – 100                 | 22.52          | 25.636 | 45.1/2.2                    | 1.043    |
| Social functioning (1)   | 1425 (100)                                           | 0 – 100                 | 50                  | 0 – 100                 | 47.73          | 41.620 | 33.1/30.1                   | 0.105    |
| Role emotional (2)       | 1425 (100)                                           | 0 – 100                 | 50                  | 0 – 100                 | 65.41          | 32.008 | 5.3/32.9                    | -0.449   |
| Mental health (2)        | 1425 (100)                                           | 0 – 100                 | 50                  | 0 – 100                 | 56.39          | 25.504 | 3.2/5.8                     | -0.230   |
| Physical component score | 1356 (95.2)                                          | 0 – 100                 | 50                  | 10 – 59                 | 30.55          | 7.700  | 0.1/0.1                     | 0.259    |
| Mental component score   | 1355 (95.1)                                          | 0 – 100                 | 50                  | 13 – 75                 | 45.16          | 12.275 | 0.1/0.1                     | -0.176   |

\*High scores indicate better health status (or less bother/impact)

SD standard deviation

Floor effect =% scoring 100 (least bother/impact); ceiling effect = % scoring 0 (greatest bother/impact)
