# Supplementary material for: A patient-reported pressure ulcer health-related quality of life instrument for use in prevention trials (PU-QOL-P): psychometric evaluation
Source: PubMed Central journal article supplement (PMC6288857; doi:10.1186/s12955-018-1049-x), 2018-12-10
Supplement: 12955_2018_1049_MOESM2_ESM.pdf [file 12955_2018_1049_MOESM2_ESM.pdf]

**Additional file 2.** PU-QOL-P function items: Exploratory factor analysis with Oblimin rotation

| Item                          | Factors and loadings (exploratory factor analysis) <sup>a</sup> |          |          |          |          |
|-------------------------------|-----------------------------------------------------------------|----------|----------|----------|----------|
|                               | Factor 1                                                        | Factor 2 | Factor 3 | Factor 4 | Factor 5 |
| EW-frustrated                 | .816                                                            |          |          |          |          |
| EW-fed-up                     | .811                                                            |          |          |          |          |
| EW-miserable                  | .792                                                            |          |          |          |          |
| EW-concerned /worried         | .762                                                            |          |          |          |          |
| EW-annoyed/ irritated         | .750                                                            |          |          |          |          |
| EW-anxious                    | .737                                                            |          |          |          |          |
| EW-no control                 | .726                                                            |          |          |          |          |
| EW-dependent                  | .713                                                            |          |          |          |          |
| EW-burden on others           | .687                                                            |          |          |          |          |
| EW-missing out                | .668                                                            |          |          |          |          |
| EW-cut-off/ isolated          | .624                                                            |          |          |          |          |
| EW-depressed                  | .622                                                            |          |          |          |          |
| SCA-helpless                  | .616                                                            |          |          |          |          |
| EW-lonely                     | .596                                                            |          |          |          |          |
| EW-angry                      | .524                                                            |          |          |          |          |
| MM-limited in using stairs    |                                                                 | .946     |          |          |          |
| MM-walking slowed             |                                                                 | .910     |          |          |          |
| MM-difficulty standing        |                                                                 | .897     |          |          |          |
| MM-limited in ability to walk |                                                                 | .891     |          |          |          |
| MM-difficulty transferring    |                                                                 | .796     |          |          |          |
| DA-toilet                     |                                                                 | .753     |          |          |          |
| DA-washing self               |                                                                 | .740     |          |          |          |
| DA-dressing                   |                                                                 | .737     |          |          |          |
| DA-doing regular activities   |                                                                 | .657     |          |          |          |
| MM-difficulty pushing up      |                                                                 | .612     |          |          |          |
| MM-difficulty adjusting       |                                                                 | .522     | .377     |          |          |
| MM-difficulty turning         |                                                                 | .521     | .357     |          |          |
| DA-doing things you enjoy     |                                                                 | .507     |          |          |          |
| MM-difficulty sitting         |                                                                 | .485     |          |          |          |
| M-appetite                    |                                                                 | .332     |          | .319     |          |
| S-kept awake                  |                                                                 |          | .858     |          |          |
| S-not getting sleep           |                                                                 |          | .812     |          |          |
| S-woken during sleep          |                                                                 |          | .797     |          |          |

|                                    |      |       |      |      |      |
|------------------------------------|------|-------|------|------|------|
| S-interrupted sleep                |      |       | .746 |      |      |
| S-trouble falling asleep           |      |       | .735 |      |      |
| S-sleep in one position            |      |       | .613 |      |      |
| S-uncomfortable                    |      | .318  | .568 |      |      |
| M-unwell                           |      |       |      | .493 |      |
| M-fatigued                         | .310 |       |      | .487 |      |
| M-reduced energy                   |      | -.377 |      | .425 |      |
| M-tired                            |      |       | .389 | .422 |      |
| SCA-uneasy being close             |      |       |      |      | .831 |
| SCA-lack understanding from others |      |       |      |      | .750 |
| SCA-embarrassed                    |      |       |      |      | .699 |
| SCA-physically unattractive        |      |       |      |      | .612 |
| SCA-self-conscious                 |      |       |      |      | .549 |
| EW-people treat you differently    |      |       |      |      | .492 |
| SCA-lack confidence                | .357 |       |      |      | .483 |
| DA-intimacy*                       |      |       |      |      |      |

<sup>a</sup>Principal axis factoring extraction with a direct oblimin rotation with Kaiser Normalisation to allow factors to be correlated. Rotation converged in 13 iterations.

Only factor-loading coefficient  $\geq 0.3$  are presented.

Items with a factor-loading coefficient  $\geq 0.4$  are retained in each factor (scale).

S sleep scale; MM movement and mobility scale; DA daily activities scale; M malaise scale; EW emotional wellbeing scale; SCA self-consciousness and appearance scale
