# Supplementary material for: A patient-reported pressure ulcer health-related quality of life instrument for use in prevention trials (PU-QOL-P): psychometric evaluation
Source: PubMed Central journal article supplement (PMC6288857; doi:10.1186/s12955-018-1049-x), 2018-12-10
Supplement: 12955_2018_1049_MOESM3_ESM.pdf [file 12955_2018_1049_MOESM3_ESM.pdf]

**Additional file 3** Known groups: No PU at baseline vs category 2 PU at baseline

| PU-QOL-P scales<br>(n items)                | Sample size          |                | Mean                 | SD     | Mean           | SD     | P value* | Mean difference | CI for difference | Effect size |
|---------------------------------------------|----------------------|----------------|----------------------|--------|----------------|--------|----------|-----------------|-------------------|-------------|
|                                             | Cat 2 PU at baseline | No PU baseline | Cat 2 PU at baseline | SD     | No PU baseline | SD     |          |                 |                   |             |
| Pain (12)                                   | 18                   | 151            | 13.342               | 21.520 | 10.908         | 20.679 | 0.639    | 2.434           | -7.79, 12.66      | 0.12        |
| Exudate (8)                                 | 3                    | 2              | 28.274               | 43.671 | 18.750         | 26.517 | 0.805    | 9.524           | -103.21, 122.26   | 0.25        |
| Odour (6)                                   | 3                    | 2              | 33.333               | 57.735 | 25.000         | 35.355 | 0.870    | 8.333           | -140.91, 157.57   | 0.16        |
| Sleep (7)                                   | 15                   | 143            | 13.571               | 31.258 | 8.851          | 19.661 | 0.408    | 4.720           | -6.52, 15.96      | 0.23        |
| Movement & mobility (9)                     | 15                   | 132            | 17.287               | 34.338 | 13.177         | 28.387 | 0.604    | 4.110           | -11.52, 19.74     | 0.14        |
| Daily activities (6)                        | 15                   | 134            | 16.111               | 31.255 | 7.152          | 20.055 | 0.126    | 8.959           | -2.54, 20.46      | 0.42        |
| Malaise (5)                                 | 12                   | 124            | 11.667               | 30.101 | 7.950          | 22.254 | 0.594    | 3.717           | -10.04, 17.47     | 0.16        |
| Emotional well-being (15)                   | 17                   | 145            | 7.010                | 20.179 | 5.733          | 16.825 | 0.772    | 1.277           | -7.43, 9.98       | 0.07        |
| Self-consciousness and appearance (7 items) | 18                   | 145            | 2.381                | 10.102 | 2.716          | 10.931 | 0.902    | -0.335          | -5.69, 5.02       | -0.03       |

\* independent t-test, 0.05 significance value

**Table** Known groups: Braden score: completely limited vs no/slight impairment

| PU-QOL-P scales<br>(n items)                | Sample size                     |                                   | Mean               | SD     | Mean                 | SD     | P value | Mean difference | CI for difference | Effect size |
|---------------------------------------------|---------------------------------|-----------------------------------|--------------------|--------|----------------------|--------|---------|-----------------|-------------------|-------------|
|                                             | Completely limited <sup>^</sup> | No/slight impairment <sup>^</sup> | Completely limited | SD     | No/slight impairment | SD     |         |                 |                   |             |
| Pain (12)                                   | 31                              | 164                               | 16.50              | 27.628 | 24.65                | 24.724 | 0.100   | -8.157          | -17.890, 1.576    | -0.32       |
| Exudate (8)                                 | 4                               | 26                                | 0.00               | 0.000  | 2.68                 | 8.886  | 0.557   | -2.679          | -11.916, 6.559    | -0.32       |
| Odour (6)                                   | 4                               | 26                                | 0.00               | 0.000  | 0.96                 | 4.903  | 0.702   | -0.962          | -6.058, 4.135     | -0.21       |
| Sleep (7)                                   | 28                              | 149                               | 21.30              | 33.397 | 20.28                | 27.745 | 0.864   | 1.017           | -10.645, 12.680   | 0.04        |
| Movement & mobility (9)                     | 20                              | 146                               | 49.38              | 44.632 | 28.72                | 33.020 | 0.013*  | 20.651          | 4.378, 36.924     | 0.60        |
| Daily activities (6)                        | 15                              | 134                               | 35.56              | 43.240 | 14.14                | 26.505 | 0.007*  | 21.414          | 6.065, 36.762     | 0.75        |
| Malaise (5)                                 | 22                              | 136                               | 24.09              | 31.609 | 15.63                | 30.086 | 0.226   | 8.466           | -5.286, 22.218    | 0.28        |
| Emotional well-being (15)                   | 24                              | 147                               | 16.03              | 26.241 | 13.01                | 26.260 | 0.602   | 3.017           | -8.395, 14.429    | 0.12        |
| Self-consciousness and appearance (7 items) | 25                              | 145                               | 12.29              | 24.530 | 6.69                 | 16.014 | 0.141   | 5.596           | -1.880, 13.072    | 0.32        |

\* independent t-test, 0.05 significance value

<sup>^</sup>Braden scores were recoded to create a dichotomous variable: completely limited (values range 6-12) vs no/slight impairment (values range 18-23).

**Table** Known groups: Location: Torso only vs limb only

| PU-QOL-P scales<br>(n items)                      | Sample size |       | Mean  | SD     | Mean  | SD     | P value* | Mean<br>difference | CI for<br>difference | Effect<br>size |
|---------------------------------------------------|-------------|-------|-------|--------|-------|--------|----------|--------------------|----------------------|----------------|
|                                                   | Limb        | Torso | Limb  |        | Torso |        |          |                    |                      |                |
| Pain (12)                                         | 29          | 96    | 23.55 | 25.551 | 25.10 | 25.321 | 0.773    | -1.550             | -12.19, 9.09         | -0.06          |
| Exudate (8)                                       | 8           | 46    | 1.56  | 4.419  | 5.28  | 14.982 | 0.492    | -3.720             | -14.51, 7.07         | -0.27          |
| Odour (6)                                         | 8           | 46    | .00   | .00    | .72   | 3.859  | 0.601    | -0.720             | -3.48, 2.04          | -0.20          |
| Sleep (7)                                         | 25          | 89    | 26.90 | 34.537 | 23.53 | 31.505 | 0.644    | 3.370              | -11.06, 17.80        | 0.10           |
| Movement &<br>mobility (9)                        | 22          | 74    | 35.32 | 41.949 | 38.57 | 35.930 | 0.721    | -3.250             | -21.26, 14.76        | -0.09          |
| Daily activities (6)                              | 21          | 77    | 22.62 | 37.652 | 20.28 | 31.701 | 0.774    | 2.340              | -13.80, 18.48        | 0.07           |
| Malaise (5)                                       | 19          | 71    | 24.74 | 38.350 | 21.62 | 34.297 | 0.732    | 3.120              | -14.93, 21.17        | 0.09           |
| Emotional well-<br>being (15)                     | 24          | 85    | 20.76 | 34.829 | 12.07 | 23.227 | 0.154    | 8.690              | -3.30, 20.68         | 0.33           |
| Self-consciousness<br>and appearance (7<br>items) | 23          | 87    | 18.17 | 30.965 | 6.73  | 16.352 | 0.017    | 11.440             | 2.05, 20.83          | 0.57           |

\* independent t-test, 0.05 significance value
