# Supplementary material for: A patient-reported pressure ulcer health-related quality of life instrument for use in prevention trials (PU-QOL-P): psychometric evaluation
Source: PubMed Central journal article supplement (PMC6288857; doi:10.1186/s12955-018-1049-x), 2018-12-10
Supplement: 12955_2018_1049_MOESM4_ESM.pdf [file 12955_2018_1049_MOESM4_ESM.pdf]

## Modified scales post hoc analysis

**Table 2** PU-QOL-R scale level analyses - Reliability and scaling assumptions: Validity within-scale analysis

| PU-QOL-P scales (n items)             | Internal consistency |                  | Mean inter-item correlation | Inter-item correlation <sup>^</sup> | Scaling Assumptions<br>-Corrected ITC <sup>^</sup> |
|---------------------------------------|----------------------|------------------|-----------------------------|-------------------------------------|----------------------------------------------------|
|                                       | n                    | Cronbach's alpha |                             |                                     |                                                    |
| Daily activities (5)                  | 189                  | 0.959            | 0.789                       | 0.644 – 0.901                       | 0.750 – 0.927                                      |
| Malaise (4)                           | 224                  | 0.921            | 0.743                       | 0.634 – 0.849                       | 0.715 – 0.879                                      |
| Emotional well-being (15)             | 215                  | 0.971            | 0.689                       | 0.513 – 0.899                       | 0.682 – 0.878                                      |
| Self-consciousness and appearance (7) | 295                  | 0.914            | 0.645                       | 0.502 – 0.795                       | 0.681 – 0.812                                      |

*SEM* standard error mean; *IIC* inter-item correlation; *ITC* item-total correlation (corrected for overlap)

<sup>^</sup>Range

**Table** Spearman's rho correlations between PU-QOL-R and SF12 scales (convergent validity)

| Scale (n items)                             | Physical function (2) | Role physical (2) | Bodily pain (1) | General health (1) | Vitality (1) | Social function (1) | Role emotional (2) | Mental health (2) |
|---------------------------------------------|-----------------------|-------------------|-----------------|--------------------|--------------|---------------------|--------------------|-------------------|
| Daily activities (5)                        | 0.120*                | 0.130**           | 0.224**         | 0.184**            | 0.085        | 0.047               | 0.278**            | 0.266**           |
| Malaise (4)                                 | 0.046                 | 0.004             | 0.253**         | 0.244**            | 0.039        | 0.062               | 0.312**            | 0.312**           |
| Emotional well-being (15)                   | 0.044                 | 0.041             | 0.227**         | 0.184**            | 0.003        | 0.023               | 0.343**            | 0.294**           |
| Self-consciousness and appearance (7 items) | 0.030                 | 0.048             | 0.216**         | 0.137**            | 0.039        | 0.054               | 0.246**            | 0.230**           |

\*Correlation is significant at the 0.05 level (2-tailed).

\*\*Correlation is significant at the 0.01 level (2-tailed).

**Table** PU-QOL-P Responsiveness over time: PU at baseline (visit 0) compared to no PU 30 days post-treatment end (visit 30)

| PU-QOL-P scales (n items)             | N  | Baseline scores | Visit30 scores   | Mean change | Effect Size | CI             | P value |
|---------------------------------------|----|-----------------|------------------|-------------|-------------|----------------|---------|
|                                       |    | Mean (SD)       | Mean (SD)        |             |             |                |         |
| Daily activities (5)                  | 22 | 22.20 (36.185)  | 11.5530 (27.209) | 10.644      | 0.33        | -7.695, 28.983 | 0.241   |
| Malaise (4)                           | 21 | 23.81 (39.903)  | 4.7619 (16.991)  | 19.048      | 0.62        | 3.820, 34.275  | 0.017   |
| Emotional well-being (15)             | 32 | 14.22 (26.162)  | 0.5208 (2.946)   | 13.700      | 0.74        | 4.251, 23.149  | 0.006   |
| Self-consciousness and appearance (7) | 31 | 9.06 (19.279)   | 0.0000 (0.000)   | 9.063       | 0.66        | 1.992, 16.134  | 0.014   |
